# Supplementary material for: Synthesis and Characterization of a pH- and Temperature-Sensitive Fe3O4-SiO2-Poly(NVCL-co-MAA) Nanocomposite for Controlled Delivery of Doxorubicin Anticancer Drug
Source: MDPI journal article supplement (doi:10.3390/polym15040968), 2023-02-15
Supplement: s1 [file s1]

# Synthesis and Characterization of a pH- and Temperature-Sensitive Fe<sub>3</sub>O<sub>4</sub>-SiO<sub>2</sub>-Poly(NVCL-co-MAA) Nanocomposite for Controlled Delivery of Doxorubicin Anticancer Drug

Jorge Luis Sánchez-Orozco <sup>1</sup>, Héctor Iván Meléndez-Ortiz <sup>2</sup>, Bertha Alicia Puente-Urbina <sup>1</sup>, Oliverio Santiago Rodríguez-Fernández <sup>1</sup>, Antonia Martínez-Luévanos <sup>3</sup> and Luis Alfonso García-Cerda <sup>1,\*</sup>

<sup>1</sup> Centro de Investigación en Química Aplicada, Departamento de Materiales Avanzados, Blvd. Enrique Reyna Hermosillo #140, Saltillo 25294, Mexico

<sup>2</sup> CONACyT-Centro de Investigación en Química Aplicada, Blvd. Enrique Reyna Hermosillo #140, Saltillo 25294, Mexico

<sup>3</sup> Facultad de Ciencias Químicas, Universidad Autónoma de Coahuila, Blvd. V. Carranza s/n, Saltillo 25280, Mexico

\* Correspondence: luis.garcia@ciqa.edu.mx; Tel.: +52-8444389830

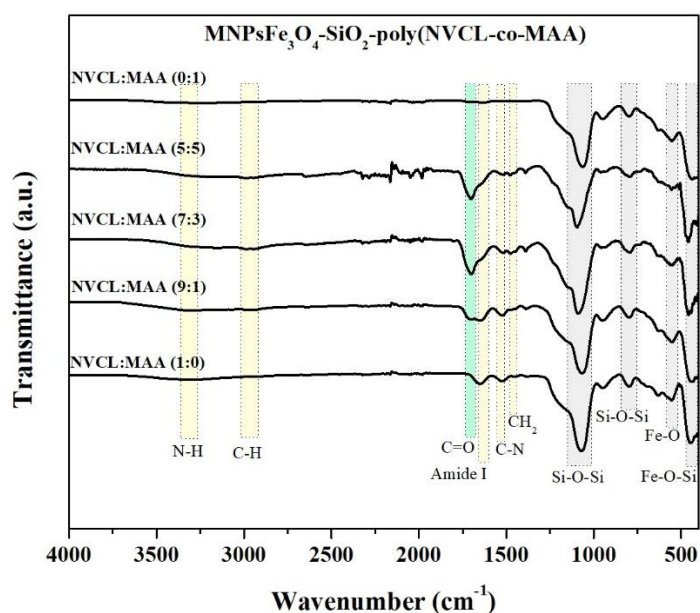

Figure S1. FTIR spectra of MNPsFe<sub>3</sub>O<sub>4</sub>-SiO<sub>2</sub>-poly(NVCL-co-MAA) nanocomposite with different monomer ratios (NVCL:MAA).

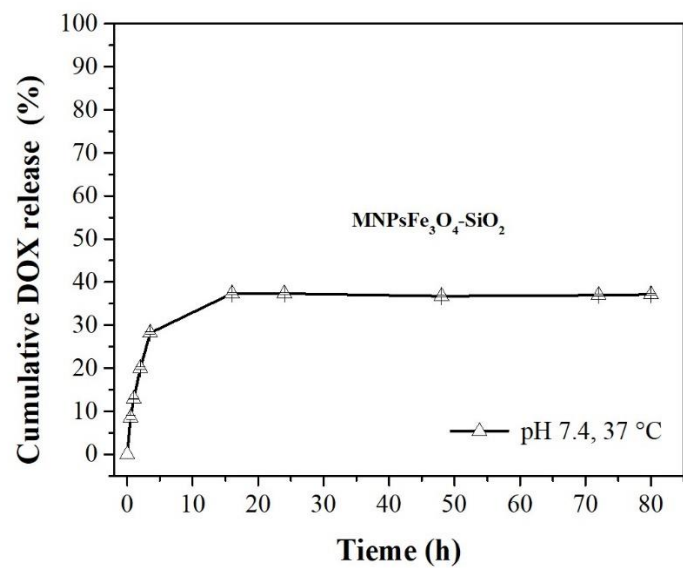

**Figure S2.** Cumulative DOX release profile for MNPsFe<sub>3</sub>O<sub>4</sub>-SiO<sub>2</sub>.
